# Supplementary material
Source: Springer Nature journal article supplement (https://www.springermedizin.de/resource/supplementary/12891_2011_1200_MOESM1_ESM.pdf/9507342)
Supplement: MOESM1 [file 9507342]



10 Newton

The image shows a physics experiment setup. A red vise is mounted on a white surface. A blue spring scale is held by a hand at the top, with its hook attached to a blue spring clip. The spring clip is attached to a black ruler. A hand with a ring is also visible, holding the ruler. A blue spring scale is hanging from the top, and a blue spring clip is attached to the bottom of the scale. The scale has a blue dial and a blue pointer. The ruler is marked in millimeters. A blue callout box points to the 10 Newton mark on the scale. Another blue callout box points to the 5 mm mark on the ruler.

5 mm
